# Supplementary material for: Alkali metal and magnesium enamides from metallation of the alkyl ligands [(2-Pyr)(SiMe3)CH2] and [6-Me-(2-Pyr)(SiMe3)CH2]: a solid state and ab initio study†
Source: Royal Society of Chemistry journal article supplement (doi:10.1039/b009596f), 2001-01-01
Supplement: b009596f.doc [file b009596f.doc]

## Dr Phil Andrews

Department of Chemistry

Monash University

Clayton

Melbourne

Vic. 3800

Australia

Phone +61 3 9905 4514

Fax +61 3 99054597

Email: p.andrews@sci.monash.edu.au

## Alkali Metal and Magnesium Enamides from Metallation of the

## Alkyl Ligands [(2-Pyr)(SiMe3)CH2] and [6-Me-(2-Pyr)(SiMe3)CH2] :

## A Solid State and *Ab Initio* Study

## *Philip C. Andrews,a* David R. Armstrong,b Colin L. Raston,a Brett A. Roberts,a Brian W. Skeltonc and Allan H. Whitec*

## a Department of Chemistry, Monash University, Clayton, Melbourne, Vic. 3800, Australia

## b Department of Pure and Applied Chemistry, University of Strathclyde, Glasgow, G1, Scotland U.K.

## c Department of Chemistry, University of Western Australia, Nedlands, Perth, W.A. Australia

**Supplementary Data**

Initial calculations were performed on the parent hydrocarbon **r**H (**I**) and its corresponding anion **r** (**II)**, to ascertain the structure of these species in the absence of an electropositive ion. The optimised geometry of **I** reveals that the pyridine ring lies almost perpendicular to the CH2-SiMe3 bond. There is a weak long-range interaction between the pyridinium N and the Si and this allows a slight tilt (~10) of the pyridine ring towards the Si. Removal of a proton from the CH2 group results in a major reorganisation of the structure with the most stable geometry having a plane of symmetry incorporating the pyridine ring, the C7-H bond and a Si-Me bond. The calculations indicate that the preferred arrangement of groups about the C2-C7-Si portion involves the C7-H bond lying *trans* to the C2-N bond and *cis* to the Si-Me bond positioned in the plane of the molecule. The corresponding *cis* arrangement of the C7-H bond and the C2-N bond is found to be 3.1 kcal mol-1 less stable while rotation of the SiMe3 group by 180 increases the total energy by 3.2 kcal mol-1.

The adoption of Cs symmetry by **II** allows -electronic conjugation to occur between the CH- unit and the pyridine ring resulting in the formation of an aza-allyl unit (N-C2-C7) with calculated bond distances of C2-N (1.369Å) and C2-C7 (1.391Å). The corresponding bond distances in the parent molecule, **I**, are 1.326Å and 1.505Å respectively and they highlight the absence of any π-electronic conjugation in **I**. Furthermore the conjugation allows the formal negative charge on the CH- unit to be dispersed somewhat and a Mulliken population analysis reveals that the pyridine ring carries 0.42 excess electrons, the SiMe3  unit has gained 0.04 extra negative charge, while the remaining anionic charge is stationed on the CH unit. Thus there are two main centres of negative charge, namely the N atom of pyridine and C7 of the CH unit. These two positions will be expected therefore to compete against each other, or to combine together, to attract the electropositive metals in the compounds **r**M.

Calculations were also performed on the 6-Me substituted derivatives of **I** and **II**. It was found that the presence of the methyl group does not significantly alter the geometry from that of the parent molecule. The major difference is a lengthening of the C6-N bond length from 1.321Å in **I** to 1.326Å. A similar lengthening of this bond (1.314Å to 1.319Å) is found on comparing the geometry of **II** with that of the anion.

The next series of calculations looked at the three complexes **IIIa**-**c** formed by reaction of **r**H with LiMe, NaMe and MgMe2 respectively. These latter were chosen as simple models of the organometallic reactants reported herein and used to form the metal derivatives. In the case of MgMe2 we examined only the 1:1 complex. For all three complexes, the co-ordinate bond formed at the N of pyridine lies roughly in the same plane as that of the pyridine ring which now is positioned ~ 90º to the CH2-SiMe3 bond. The only notable change in the geometry of the **r**H moiety upon complexing is a slight lengthening of both C-N bonds. The calculated co-ordinate bond lengths, N-M, are 2.058Å (**IIIa**), 2.449Å (**IIIb**), and 2.266Å (**IIIc).** The N-M-CH3 angles of 170.3º (**IIIa**), 154.5º (**IIIb**) and 115.6º (**IIIc**) illustrate that an interaction, albeit slight, is present between the CH2 unit of **r**H and the Me group of the reactant. The calculated energies of complexing are –23.2 kcal mol-1 (**IIIa**), -15.3 kcal mol-1 (**IIIb)** and –17.3 kcal mol-1 (**IIIc**).

It was logical to next look at the transition-state of this metallation process of **r**H that involves the interaction of a hydrogen of the CH2 group with the organic group of the MR reactant to give the corresponding hydrocarbon and **r**M. This was investigated for M=Li (**IVa**) and M=Na (**IVb**). Each geometry optimised transition state of  **IV** contains a six-membered ring (H-C7-C2-N-M-Me) formed by the interaction of a hydrogen of the CH2 group of  **r**H with the carbon of the MMe reactant. Interestingly the bond lengths in these two rings have alternatively increased and decreased on transformation from **III** to **IV**. Thus for **IVa** the C7-H bond length has increased from 1.086Å to 1.418Å, the new H-CH3 bond distance has decreased from 3.591Å to 1.5091Å. Similarly the Li-CH3 bond has lengthened to 2.133Å (cf 2.021Å) while the Li-N bond has shortened to 1.980Å (cf 2.058Å). The trend is completed by the C2-N bond length extending to 1.342Å from 1.332Å and the contraction of the C2-C7 distance from 1.502Å to 1.470Å. This reorganisation of the bonds has meant that the energy of **IVa** is 31.6 kcal mol-1 higher than that of **IIIa** but only 8.3 kcal mol-1 higher than the energy of the initial reactants. The corresponding energy values for the sodium system are 27.1 kcal mol-1 for the energy difference between **IVb** and **IIIb** and 12.0 kcal mol-1 for the energy gap between **IVb** and the initial reactants.

The total energies (in a.u.) of the unique calculated structures are :

**I -**692.955089; **II** -692.334525; **IIIa** -740.007743; **IIIb** -894.379055; **IIIc** -971.775347;

**IVa** -739.957385; **IVb** -894.335852; **Va** -699.825487; **Vb** -699.820383; **Vc** -699.805714;

**Vf** -699.814170; **VIa** -854.206047; **VIb** -854.201588; **VIc** -854.188508; **VIf** -854.192929;

**VIIb** -1584.378738; **VIIc** -1584.378750; **VIId** -1584.378202; **VIIIa** -756.045209;

**VIIIb** -756.041952; **VIIIc** -756.028578; **IXa** -910.419024; **IXb** -910.415535; **IXc** –910.403970;
